# Supplementary material
Source: ML conference proceedings conference paper supplement (https://openreview.net/forum?id=14E7S17hFv)
Supplement: supplementary_material [file attachment]

# COUNTERINTUITIVE RL: THE HIDDEN VALUE OF ACTING BAD

**Anonymous authors**

Paper under double-blind review

## 1 HYPERPARAMETER AND ARCHITECTURE DETAILS

Table 1: Hyperparameters and architectures used in the experiments for our proposed algorithm MaxMin TD Learning, canonical algorithm  $\epsilon$ -greedy and NoisyNetworks.

| Hyperparameters                          | Settings (For all of the algorithms) |
|------------------------------------------|--------------------------------------|
| Grey-scaling                             | True                                 |
| Observation down-sampling                | (84, 84)                             |
| Frames stacked                           | 4                                    |
| Action repetitions                       | 4                                    |
| Batch Size                               | 32                                   |
| Update                                   | Double-Q                             |
| Max Frames per episode                   | 108000                               |
| Exploration epsilon                      | 0.01                                 |
| Evaluation exploration epsilon           | 0.01                                 |
| Exploration epsilon decay frame fraction | 0.008                                |
| Gradient error bound                     | 0.03125                              |
| Learning rate                            | 0.00025                              |
| Optimizer epsilon                        | $0.01/32^2$                          |
| Optimizer                                | Adam                                 |
| Discount factor                          | 0.99                                 |
| Maximum absolute rewards                 | 1                                    |
| Number of iterations                     | 40                                   |
| Number of training frames                | $10^4$                               |
| Nesterov Momentum                        | True                                 |
| Hardware                                 | GPU                                  |
| NoisyNetwork parameter                   | 0.1                                  |
| $Q$ -Network channels                    | 32,64,64                             |
| $Q$ -Network filter size                 | $8 \times 8, 4 \times 4, 3 \times 3$ |
| $Q$ -Network stride                      | (4, 4), (2, 2), (1, 1)               |
| $Q$ -Network hidden units                | 512                                  |

For reproducibility and completeness in research in Table 1 we report the hyperparameter details for our proposed algorithm MaxMin TD Learning, canonical algorithm  $\epsilon$ -greedy and NoisyNetworks. Furthermore, for all of the algorithms the hyperparameters and the architectures are identical with each other. Note that the architecture parameters are also identical for the 200 million frame training. Note that we did not tune hyperparameters reported below. To increase transparency in research we kept hyperparameters exactly the same with the prior studies. We ran our experiments with the JAX implementation from Bradbury et al. (2018). We used Haiku Hennigan et al. (2020) for the neural network library, Optax Hessel et al. (2020) for the optimization library, and RLax for the reinforcement learning library Babuschkin et al. (2020).

## 2 ARCADE LEARNING ENVIRONMENT RESULTS

Table 2 reports the average scores for human, random, our proposed algorithm MaxMin TD Learning, canonical algorithm  $\epsilon$ -greedy and NoisyNetworks for all of the games in the Arcade Learning

Environment 100K benchmark. Scores are reported with the mean over 5 random seeds. The highest score amongst the three algorithms is marked with bold font. We also reported human scores and random scores to provide complete information on the learning curves reported in the main body of the paper.

Table 2: Average returns for human, random, our proposed algorithm MaxMin TD Learning, canonical algorithm  $\epsilon$ -greedy and NoisyNetworks across all of the games in the Arcade Learning Environment 100K benchmark. Scores are averaged over 5 random seeds.

| Games          | Human   | Random  | $\epsilon$ -greedy | NoisyNetworks   | MaxMin TD Learning |
|----------------|---------|---------|--------------------|-----------------|--------------------|
| Alien          | 7127.7  | 227.8   | 498.47             | 466.50          | <b>595.70</b>      |
| Amidar         | 1719.5  | 5.8     | 42.31              | <b>42.83</b>    | 41.94              |
| Assault        | 742.0   | 222.4   | <b>396.00</b>      | 375.72          | 383.25             |
| Asterix        | 8503.3  | 210.0   | 306.36             | 305.64          | <b>410.07</b>      |
| BankHeist      | 753.1   | 14.2    | <b>15.72</b>       | 13.1            | 13.45              |
| BattleZone     | 37187.5 | 2360.0  | 1844.61            | 1100.00         | <b>2200.00</b>     |
| Boxing         | 12.1    | 0.1     | 7.25               | 4.6             | <b>7.9</b>         |
| Breakout       | 30.5    | 1.7     | 4.83               | 5.33            | <b>9.03</b>        |
| ChopperCommand | 7387.8  | 811.0   | 639.48             | 919.83          | <b>987.83</b>      |
| CrazyClimber   | 35829.4 | 10780.5 | 10075.00           | <b>18550.00</b> | 9870.00            |
| DemonAttack    | 1971.0  | 152.1   | <b>1365.60</b>     | 576.5           | 745.00             |
| Freeway        | 29.6    | 0.0     | 0.00               | 5.1             | <b>14.00</b>       |
| FrostBite      | 4334.7  | 65.2    | 184.41             | 167.60          | <b>206.40</b>      |
| Gopher         | 2412.5  | 257.6   | 633.84             | 468.66          | <b>664.00</b>      |
| Hero           | 30826.4 | 1027.0  | 1628.42            | <b>1884.50</b>  | 1528.40            |
| Jamesbond      | 302.8   | 29.0    | 21.73              | <b>22.08</b>    | 19.33              |
| Kangaroo       | 3035.0  | 52.0    | 251.00             | 90.00           | <b>280.83</b>      |
| Krull          | 2665.5  | 1598.0  | <b>2206.02</b>     | 2040.50         | 1491.5             |
| KungFuMaster   | 22736.3 | 258.5   | <b>7116.94</b>     | 5665.00         | 4045.00            |
| Mspacman       | 6951.6  | 307.3   | 719.16             | <b>912.83</b>   | 671.08             |
| Pong           | 14.6    | -20.7   | -8.18              | <b>-2.3</b>     | -6.30              |
| PrivateEye     | 69571.3 | 24.9    | 0.25               | -7.50           | <b>30.0</b>        |
| Qbert          | 13455.0 | 163.9   | <b>519.71</b>      | 556.08          | 466.83             |
| RoadRunner     | 7845.0  | 11.5    | <b>3600.85</b>     | 1527.35         | 670.66             |
| Seaquest       | 42054.7 | 68.4    | 206.49             | 333.66          | <b>348.00</b>      |
| UpNdnDown      | 11693.2 | 533.4   | 1858.41            | 1948.00         | <b>1953.91</b>     |

Also further note that in 6 games<sup>1</sup> simple double- $Q$  learning already outperforms Rainbow in the low data regime. Note that Rainbow has several additional components such as dueling network, multi-step return, distributional reinforcement learning that introduces new parameters as large as the number of bins used in the algorithm, and NoisyNetworks. Thus, the fact that MaxMin TD Learning with simple double- $Q$  learning achieves a higher score in these games than an algorithm that combines all these various techniques is further evidence that demonstrates the NoisyNetworks can be replaced with the MaxMin TD Learning algorithm in Rainbow as a future research direction to obtain better performance. Also further note that MaxMin TD Learning does not introduce any additional new parameters as NoisyNetworks does; more precisely, NoisyNetworks doubles the number of parameters used in the  $Q$ -network. Hence, the fact that MaxMin TD Learning achieves higher performance as also reported in the main body of the paper without any additional computational cost further demonstrates the benefits of the utilization of MaxMin TD Learning in a more diversified portfolio of algorithms as a zero cost exploration technique.

<sup>1</sup>Boxing, Breakout, ChopperCommand, DemonAttack, Gopher, Pong

## 2.1 MODEL-BASED COMPARISON

The human normalized median score of model-based reinforcement learning in the 100K Arcade Learning Environment benchmark is 0.144 (Kaiser et al., 2020). On the other hand the human normalized median score achieved by MaxMin TD Learning with baseline deep reinforcement learning algorithm QRDQN is **0.158**. Hence, MaxMinTD learning results in achieving higher scores without even building a model of the environment.

[1] Lukasz Kaiser, Mohammad Babaeizadeh, Piotr Milos, Blazej Osinski, Roy H. Campbell, Konrad Czechowski, Dumitru Erhan, Chelsea Finn, Piotr Kozakowski, Sergey Levine, Ryan Sepassi, George Tucker, Henryk Michalewski. Model-Based Reinforcement Learning for Atari, ICLR 2020. [Spotlight Presentation]

## 3 THE EFFECT OF MINIMUM ACTION ON THE TEMPORAL DIFFERENCE

**Proposition 3.1.** *Let  $\theta$  be the random initial weights for the  $Q$ -function. For any state  $s \in \mathcal{S}$  let  $a^{\min}(s) = \arg \min_{a' \in \mathcal{A}} Q_{\theta}(s, a')$ . Then for any  $a \in \mathcal{A}$*

$$\mathbb{P}_{\theta \sim \Theta} \left[ \arg \min_{a' \in \mathcal{A}} Q_{\theta}(s, a') = a \right] = \frac{1}{|\mathcal{A}|}$$

*i.e. the distribution  $\mathbb{P}_{\theta \sim \Theta}[a^{\min}(s)]$  is uniform. Simultaneously, the conditional distribution  $\mathbb{P}_{\theta \sim \Theta}[a^{\min}(s) \mid \theta]$  is constant.*

*Proof.* Since  $Q_{\theta}(s, \cdot)$  is a random function (given the random choice of  $\theta$ ), each action  $a \in \mathcal{A}$  is equally likely to be assigned the minimum  $Q$ -value in state  $s$ . Thus,

$$\mathbb{P}_{\theta \sim \Theta} \left[ \arg \min_{a' \in \mathcal{A}} Q_{\theta}(s, a) = a \right] = \frac{1}{|\mathcal{A}|}.$$

However, given the value of  $\theta$ , the value of  $a^{\min}(s)$  is uniquely determined because

$$a^{\min}(s) = \arg \min_{a \in \mathcal{A}} Q_{\theta}(s, a).$$

Therefore, the distribution of  $a^{\min}(s)$  conditional on  $\theta$  is constant.  $\square$

## 4 ADDITIONAL RESULTS ON THE MOTIVATING EXAMPLE

Figure 1 reports the learning curves for the motivating example provided in the main body of the paper with variations in  $\epsilon$ . These results combined with the results reported in Figure 1 in the main body of the paper again further demonstrate that in any given range of  $\epsilon$  MaxMin TD learning results in substantially faster learning compared to  $\epsilon$ -greedy.

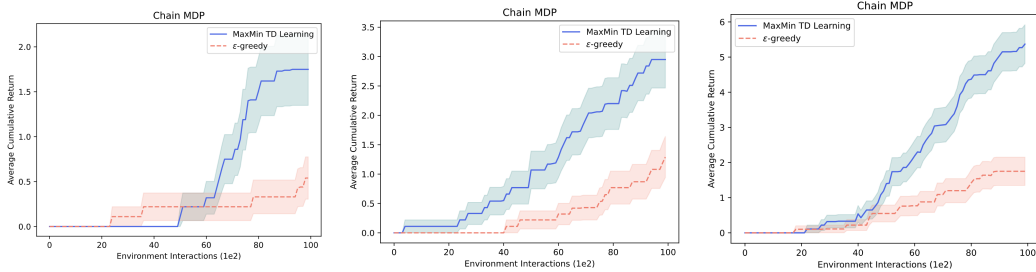

Figure 1: Learning curves in the chain MDP with our proposed algorithm MaxMin TD Learning, the canonical algorithm  $\epsilon$ -greedy with variations in  $\epsilon$ . Left:  $\epsilon = 0.01$ . Center:  $\epsilon = 0.03$ . Right:  $\epsilon = 0.05$ .

## 5 EXTENSION OF MAXMIN TD LEARNING TO DIFFERENT REINFORCEMENT LEARNING ALGORITHMS

While the main paper focuses on Deep Double  $Q$ -Network, Figure 2 reports human normalized median and human normalized 80<sup>th</sup> percentile scores for MaxMin TD Learning and  $\epsilon$ -greedy with the QRDQN algorithm<sup>2</sup> across all of the tasks of the Arcade Learning Environment 100K benchmark. With MaxMin TD Learning QRDQN is able to achieve **0.158** human normalized median score. Note that data-efficient Rainbow can only achieve 0.12 human normalized median scores (van Hasselt et al., 2019). Furthermore, note that Rainbow contains dueling architecture, multi-step return, noisy networks on top of the distributional reinforcement learning. Thus, the fact that QRDQN, a baseline distributional reinforcement learning algorithm, can achieve human normalized median score that is already substantially higher than data-efficient Rainbow once more demonstrates the substantial sample efficiency gained by the MaxMin TD Learning algorithm. Furthermore, the significantly higher performance gain obtained by MaxMin TD Learning over all tasks of the Arcade Learning Environment 100K benchmark as reported via the human normalized scores in Figure 2, once more demonstrates that MaxMin TD Learning increases the performance of the baseline algorithms further beyond the performance of much more complicated algorithms.

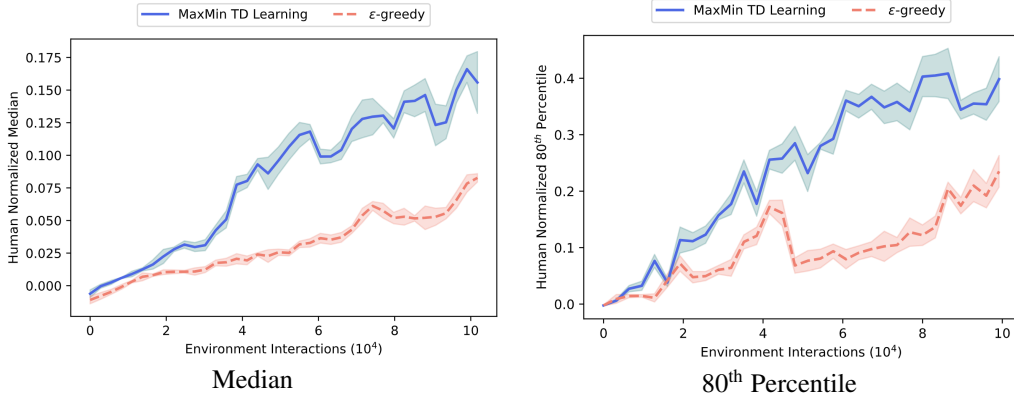

Figure 2: Human normalized median and human normalized 80<sup>th</sup> percentile scores of QRDQN with MaxMin TD Learning and  $\epsilon$ -greedy in the Arcade Learning Environment 100K benchmark.

### 5.1 FURTHER RESULTS ON UCB

In this section we further report results with variations in UCB constant. The results reported in Figure 3 demonstrate that variations across UCB constant has slight affects on the learning curve where UCB constant is equal to 0.5 gives the results where UCB learns the fastest.

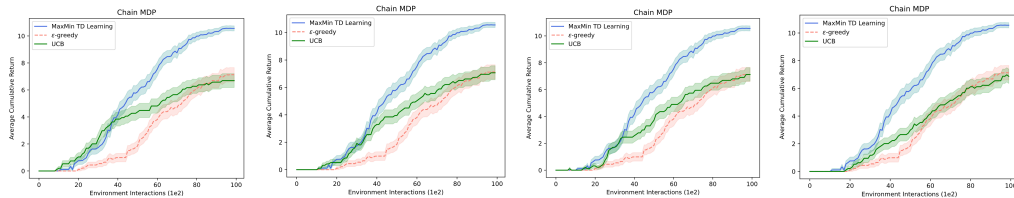

Figure 3: Learning curves in the chain MDP with our proposed algorithm MaxMin TD Learning, the canonical algorithm  $\epsilon$ -greedy with variations in UCB constant. Left: UCB constant = 0.5. Left Center: UCB constant = 1. Right Center: UCB constant = 2. Right: UCB constant = 3.

<sup>2</sup>QRDQN is one of the baseline distributional reinforcement learning algorithms.

## 5.2 FURTHER COMPARISON AND RESULTS ON FLIPPING COINS TO ESTIMATE PSEUDOCOUNTS IN REINFORCEMENT LEARNING

In this section we also further report results with a more recent technique (Lobel et al., 2023). In particular, Figure 4 reports results for the CFN, our proposed algorithm MaxMin TD Learning, UCB and the canonical algorithm  $\epsilon$ -greedy. These results once more demonstrate that MaxMin TD learning substantially outperforms both the canonical methods and a portfolio of quite recent algorithms.

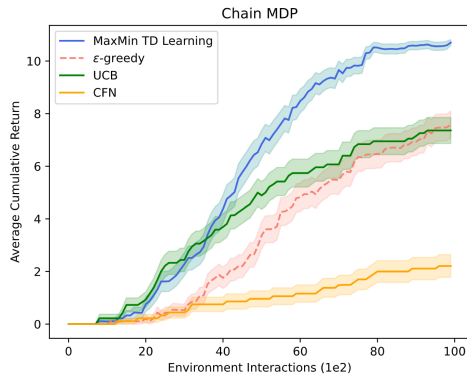

Figure 4: Flipping Coins to Estimate Pseudocounts in Reinforcement Learning, i.e. CFN, our proposed algorithm MaxMin TD Learning, UCB and the canonical algorithm  $\epsilon$ -greedy results in the chain MDP.

## REFERENCES

- Igor Babuschkin, Kate Baumli, Alison Bell, Surya Bhupatiraju, Jake Bruce, Peter Buchlovsky, David Budden, Trevor Cai, Aidan Clark, Ivo Danihelka, Claudio Fantacci, Jonathan Godwin, Chris Jones, Tom Hennigan, Matteo Hessel, Steven Kapturowski, Thomas Keck, Iurii Kemaev, Michael King, Lena Martens, Hamza Merzic, Vladimir Mikulik, Tamara Norman, John Quan, George Papamakarios, Roman Ring, Francisco Ruiz, Alvaro Sanchez, Rosalia Schneider, Eren Sezener, Stephen Spencer, Srivatsan Srinivasan, Wojciech Stokowiec, and Fabio Viola. The DeepMind JAX Ecosystem, 2020. URL <http://github.com/deepmind>.
- James Bradbury, Roy Frostig, Peter Hawkins, Matthew James Johnson, Chris Leary, Dougal Maclaurin, George Nectou, Adam Paszke, Jake VanderPlas, Skye Wanderman-Milne, and Qiao Zhang. JAX: composable transformations of Python+NumPy programs, 2018. URL <http://github.com/google/jax>.
- Tom Hennigan, Trevor Cai, Tamara Norman, and Igor Babuschkin. Haiku: Sonnet for JAX, 2020. URL <http://github.com/deepmind/dm-haiku>.
- Matteo Hessel, David Budden, Fabio Viola, Mihaela Rosca, Eren Sezener, and Tom Hennigan. Optax: composable gradient transformation and optimisation, in jax!, 2020. URL <http://github.com/deepmind/optax>.
- Lukasz Kaiser, Mohammad Babaeizadeh, Piotr Milos, Blazej Osinski, Roy H. Campbell, Konrad Czechowski, Dumitru Erhan, Chelsea Finn, Piotr Kozakowski, Sergey Levine, Afroz Mohiuddin, Ryan Sepassi, George Tucker, and Henryk Michalewski. Model based reinforcement learning for atari. In *8th International Conference on Learning Representations, ICLR 2020*, 2020.
- Sam Lobel, Akhil Bagaria, and George Konidaris. Flipping coins to estimate pseudocounts for exploration in reinforcement learning. In *International Conference on Machine Learning, ICML 2023*, volume 202 of *Proceedings of Machine Learning Research*, pp. 22594–22613. PMLR, 2023.
- Hado van Hasselt, Matteo Hessel, and John Aslanides. When to use parametric models in reinforcement learning? In Hanna M. Wallach, Hugo Larochelle, Alina Beygelzimer, Florence d’Alché-Buc, Emily B. Fox, and Roman Garnett (eds.), *Advances in Neural Information Processing Systems 32: Annual Conference on Neural Information Processing Systems 2019, NeurIPS 2019, December 8-14, 2019, Vancouver, BC, Canada*, pp. 14322–14333, 2019.
